# Supplementary material
Source: HighWire-hosted journal article supplement (https://jmg.bmj.com/content/jmedgenet-2019-106189)
Supplement: inline-supplementary-material-3 [file inline-supplementary-material-3.docx]

| **Patient ID**  **Supplementary Table 3.** Description of the loss-of-function variants identified in the study along with patients’ age at diagnosis, personal and family history. | **Gene** | **DNA variation** | **Predicted**  **Protein consequence** | **Brca 1 dx** | **BrCa 2 dx** | **Other Ca dx** | **FH** | **TNBC** |
| --- | --- | --- | --- | --- | --- | --- | --- | --- |
| F2352 | *ATM* | c.1215delT | p.Asn405fs | 37 |  |  | yes | no |
| F2572 | *ATM* | c.1215delT | p.Asn405fs | 37 |  |  | yes | no |
| F2892 | *ATM* | c.1215delT | p.Asn405fs | 33 |  |  | no | no |
| F622 | *ATM* | c.1215delT | p.Asn405fs | 35 | 35 |  | no | no |
| F979 | *ATM* | c.2250G>A | p.Glu709_Lys750del | 43 | 43 |  | yes | no |
| F965 | *ATM* | c.2921+1G>A | p.Ser974_Trp1026del | 47 | 54 |  | yes | no |
| F2237 | *ATM* | c.3576G>A | p.Ser1135_Lys1192del | 35 |  |  | no | no |
| F735 | *ATM* | c.4683_4689delTTTAGAT | p.Asp1563fs | 38 |  |  | yes | no |
| F805 | *ATM* | c.5644C>T | p.Arg1882Ter | 34 |  |  | yes | no |
| F1353 | *ATM* | c.5932G>T | p.Gly1978Ter | 47 |  |  | yes | no |
| F985 | *ATM* | c.7307delG | p.Arg2436fs | 36 | 36 |  | yes | no |
| F2759 | *ATM* | c.757G>T | p.Glu253Ter | 46 |  |  | yes | no |
| F2360 | *ATM* | c.8218C>T | p.Gln2740Ter | 57 |  | EndCa 57 | yes | yes |
| F2570 | *ATM* | c.8395_8404delTTTCAGTGCC | p.Phe2799fs | 39 |  |  | yes | no |
| F2771 | *ATM* | c.8766dupT | p.Val2923fs | 55 | 55 |  | yes | no |
| F1624 | *ATM* | c.8925_8928dupAGAT | p.Glu2977fs | 59 |  |  | yes | no |
| F2769 | *BLM* | c.1642C>T | p.Gln548Ter | 43 |  |  | yes | no |
| F2394 | *BRCA1* | c.(?_-4600)_(249+1_250-1)del | p.? | 23 |  |  | yes | yes |
| F2762 | *BRCA1* | c.68_69delAG | p.Glu23fs | 47 | 55 |  | yes | yes |
| F1126 | *BRCA1* | c.181T>G | p.Cys61Gly | 37 |  |  | yes | yes |
| F1164 | *BRCA1* | c.181T>G | p.Cys61Gly | 46 | 52 |  | yes | yes |
| F1249 | *BRCA1* | c.181T>G | p.Cys61Gly | 38 | 39 |  | yes | yes |
| F1257 | *BRCA1* | c.181T>G | p.Cys61Gly | 41 |  |  | yes | yes |
| F2235 | *BRCA1* | c.181T>G | p.Cys61Gly | 33 |  |  | yes | yes |
| F2327 | *BRCA1* | c.181T>G | p.Cys61Gly | 32 |  | OvCa 49 | yes | yes |
| F2357 | *BRCA1* | c.181T>G | p.Cys61Gly | 57 |  | OvCa 60 | yes | no |
| F2400 | *BRCA1* | c.181T>G | p.Cys61Gly | 33 |  |  | yes | yes |
| F2501 | *BRCA1* | c.181T>G | p.Cys61Gly | 58 |  | OvCa 40 | yes | yes |
| F2672 | *BRCA1* | c.181T>G | p.Cys61Gly | 34 |  |  | yes | no |
| F324 | *BRCA1* | c.181T>G | p.Cys61Gly | 37 | 42 |  | yes | N/A |
| F849 | *BRCA1* | c.181T>G | p.Cys61Gly | 43 | 54 |  | yes | yes |
| F1472 | *BRCA1* | c.302-2A>G | p.? | 25 |  |  | yes | yes |
| F1085 | *BRCA1* | c.331delG | p.Glu111fs | 55 |  |  | yes | yes |
| F2486 | *BRCA1* | c.331delG | p.Glu111fs | 36 | 49 | OvCa 42 | yes | no |
| F1238 | *BRCA1* | c.1058G>A | p.Trp353Ter | 30 |  |  | yes | yes |
| F1936 | *BRCA1* | c.1058G>A | p.Trp353Ter | 33 |  |  | N/A | yes |
| F1181 | *BRCA1* | c.1210_1211insCT | p.Glu404fs | 39 |  | OvCa 50 | yes | yes |
| F315 | *BRCA1* | c.1504_1508delΤΤΑΑΑ | p.Leu502fs | 25 |  |  | yes | N/A |
| F932 | *BRCA1* | c.1504_1508delΤΤΑΑΑ | p.Leu502fs | 47 |  |  | yes | yes |
| F1708 | *BRCA1* | c.2504dupA | p.His835fs | 66 |  |  | yes | yes |
| F2346 | *BRCA1* | c.2504dupA | p.His835fs | 36 |  | OvCa 56 | yes | yes |
| F796 | *BRCA1* | c.2963C>A | p.Ser988Ter | 29 |  |  | no | yes |
| F145 | *BRCA1* | c.3158_3159insG | p.Val1054fs | 62 |  | OvCa 71 | yes | N/A |
| F1016 | *BRCA1* | c.3178G>T | p.Glu1060Ter | 34 |  |  | yes | no |
| F1144 | *BRCA1* | c.3375_3376delTC | p.Pro1126fs | 20 | 48 |  | no | yes |
| F2014 | *BRCA1* | c.3375_3376delTC | p.Pro1126Ilefs | 43 |  | OvCa 47 | yes | yes |
| F483 | *BRCA1* | c.3375_3376delTC | p.Pro1126fs | 30 |  |  | yes | yes |
| F1004 | *BRCA1* | c.3607C>T | p.Arg1203Ter | 57 |  |  | yes | yes |
| F1025 | *BRCA1* | c.3607C>T | p.Arg1203Ter | 32 |  |  | yes | yes |
| F1117 | *BRCA1* | c.3607C>T | p.Arg1203Ter | 40 |  |  | yes | yes |
| F230 | *BRCA1* | c.3607C>T | p.Arg1203Ter | 26 | 40 | OvCa 46 | yes | yes |
| F430 | *BRCA1* | c.3607C>T | p.Arg1203Ter | 40 |  |  | yes | yes |
| F1604 | *BRCA1* | c.3607C>T | p.Arg1203Ter | 43 |  | OvCa 48 | yes | no |
| F1719 | *BRCA1* | c.3607C>T | p.Arg1203Ter | 40 |  |  | yes | yes |
| F1789 | *BRCA1* | c.3607C>T | p.Arg1203Ter | 27 |  |  | N/A | N/A |
| F425 | *BRCA1* | c.3624delA | p.Lys1208fs | 50 |  |  | yes | yes |
| F64 | *BRCA1* | c.3624delA | p.Lys1208fs | 31 | 33 |  | yes | yes |
| F820 | *BRCA1* | c.3624delA | p.Lys1208fs | 29 |  |  | yes | yes |
| F2618 | *BRCA1* | c.3700_3704delGTAAA | p.Val1234fs | 53 |  |  | yes | no |
| F393 | *BRCA1* | c.3700_3704delGTAAA | p.Val1234fs | 42 |  |  | yes | N/A |
| F699 | *BRCA1* | c.3700_3704delGTAAA | p.Val1234fs | 42 | 43 | OvCa 45 | yes | no |
| F749 | *BRCA1* | c.3700_3704delGTAAA | p.Val1234fs | 33 |  |  | yes | yes |
| F1008 | *BRCA1* | c.3755_3758delTGTC | p.Ser1253fs | 38 |  |  | yes | yes |
| F2523 | *BRCA1* | c.3755_3758delTGTC | p.Ser1253fs | 45 |  |  | yes | no |
| F914 | *BRCA1* | c.3756_3759delGTCT | p.Ser1253fs | 50 |  |  | yes | no |
| F1507 | *BRCA1* | c.4065_4068delTCAA | p.Asn1355fs | 31 |  |  | yes | yes |
| F824 | *BRCA1* | c.4168_4169delTG | p.Ser1389fs | 33 |  |  | yes | yes |
| F1393 | *BRCA1* | c.4205delA | p.His1402fs | 41 | 41 | OvCa 50 | yes | no |
| F1675 | *BRCA1* | c.4327C>T | p.Arg1443Ter | 29 | 36 |  | yes | yes |
| F2099 | *BRCA1* | c.4327C>T | p.Arg1443Ter | 29 | 56 |  | yes | yes |
| F2196 | *BRCA1* | c.4327C>T | p.Arg1443Ter | 42 |  |  | yes | no |
| F518 | *BRCA1* | c.4391_4393delCTAinsTT | p.Pro1464fs | 39 |  |  | yes | yes |
| F1127 | *BRCA1* | c.4391_4393delCTAinsTT | p.Pro1464fs | 36 |  | OvCa 41 | yes | yes |
| F678 | *BRCA1* | c.4576G>T | p.Glu1526Ter | 30 |  |  | yes | yes |
| F1861 | *BRCA1* | c.4964_4982del19 | p.Ser1655fs | 59 |  | OvCa 57 | yes | yes |
| F1660 | *BRCA1* | c.5030_5033delCTAA | p.Thr1677fs | 53 |  |  | yes | yes |
| F2404 | *BRCA1* | c.5075-1G>A | p.Asp1692_Trp1718delinsGly | 47 | 52 |  | yes | yes |
| F1045 | *BRCA1* | c.5212G>A | p.Gly1738Arg | 33 |  |  | no | yes |
| F1150 | *BRCA1* | c.5212G>A | p.Gly1738Arg | 35 |  |  | no | yes |
| F125 | *BRCA1* | c.5212G>A | p.Gly1738Arg | 42 |  |  | yes | yes |
| F1443 | *BRCA1* | c.5212G>A | p.Gly1738Arg | 38 | 40 |  | yes | yes |
| F1526 | *BRCA1* | c.5212G>A | p.Gly1738Arg | 41 |  |  | yes | yes |
| F1539 | *BRCA1* | c.5212G>A | p.Gly1738Arg | 28 |  |  | no | yes |
| F1652 | *BRCA1* | c.5212G>A | p.Gly1738Arg | 26 |  |  | yes | no |
| F1753 | *BRCA1* | c.5212G>A | p.Gly1738Arg | 41 |  |  | yes | no |
| F1785 | *BRCA1* | c.5212G>A | p.Gly1738Arg | 36 | 48 |  | yes | yes |
| F193 | *BRCA1* | c.5212G>A | p.Gly1738Arg | 62 |  |  | yes | N/A |
| F1949 | *BRCA1* | c.5212G>A | p.Gly1738Arg | 35 |  |  | yes | no |
| F2104 | *BRCA1* | c.5212G>A | p.Gly1738Arg | 49 | 59 | OvCa 53 | yes | yes |
| F2202 | *BRCA1* | c.5212G>A | p.Gly1738Arg | 51 | 59 |  | yes | yes |
| F2434 | *BRCA1* | c.5212G>A | p.Gly1738Arg | 43 | 57 |  | yes | yes |
| F2537 | *BRCA1* | c.5212G>A | p.Gly1738Arg | 39 |  |  | yes | yes |
| F276 | *BRCA1* | c.5212G>A | p.Gly1738Arg | 27 |  |  | yes | N/A |
| F285 | *BRCA1* | c.5212G>A | p.Gly1738Arg | 46 |  |  | yes | yes |
| F287 | *BRCA1* | c.5212G>A | p.Gly1738Arg | 52 |  |  | yes | N/A |
| F373 | *BRCA1* | c.5212G>A | p.Gly1738Arg | 39 | 47 |  | yes | no |
| F419 | *BRCA1* | c.5212G>A | p.Gly1738Arg | 29 |  |  | yes | N/A |
| F634 | *BRCA1* | c.5212G>A | p.Gly1738Arg | 43 |  |  | yes | yes |
| F688 | *BRCA1* | c.5212G>A | p.Gly1738Arg | 39 |  |  | yes | yes |
| F707 | *BRCA1* | c.5212G>A | p.Gly1738Arg | 26 | 31,33,41 |  | yes | N/A |
| F710 | *BRCA1* | c.5212G>A | p.Gly1738Arg | 35 | 42 |  | yes | yes |
| F739 | *BRCA1* | c.5212G>A | p.Gly1738Arg | 24 |  |  | yes | yes |
| F750 | *BRCA1* | c.5212G>A | p.Gly1738Arg | 34 |  |  | yes | yes |
| F85 | *BRCA1* | c.5212G>A | p.Gly1738Arg | 36 | 45 | PanCa 54 | yes | no |
| F909 | *BRCA1* | c.5212G>A | p.Gly1738Arg | 39 |  | CRC 40 | yes | no |
| F1420 | *BRCA1* | c.5246C>G | p.Pro1749Arg | 27 |  |  | yes | yes |
| F1142 | *BRCA1* | c.5251C>T | p.Arg1751Ter | 42 |  |  | yes | yes |
| F1198 | *BRCA1* | c.5251C>T | p.Arg1751Ter | 30 |  |  | yes | yes |
| F1463 | *BRCA1* | c.5251C>T | p.Arg1751Ter | 46 |  |  | yes | yes |
| F1687 | *BRCA1* | c.5251C>T | p.Arg1751Ter | 25 |  |  | yes | yes |
| F189 | *BRCA1* | c.5251C>T | p.Arg1751Ter | 41 |  | OvCa 42 | yes | yes |
| F2229 | *BRCA1* | c.5251C>T | p.Arg1751Ter | 32 |  |  | yes | yes |
| F2754 | *BRCA1* | c.5251C>T | p.Arg1751Ter | 30 |  |  | yes | yes |
| F2816 | *BRCA1* | c.5251C>T | p.Arg1751Ter | 41 |  |  | yes | yes |
| F298 | *BRCA1* | c.5251C>T | p.Arg1751Ter | 30 |  | OvCa 40 | yes | yes |
| F601 | *BRCA1* | c.5251C>T | p.Arg1751Ter | 47 |  |  | yes | N/A |
| F737 | *BRCA1* | c.5251C>T | p.Arg1751Ter | 45 |  |  | yes | yes |
| F1024 | *BRCA1* | c.5256_5278-2757del | p.Arg1753fs | 46 |  | OvCa 48 | yes | yes |
| F1042 | *BRCA1* | c.5256_5278-2757del | p.Arg1753fs | 33 | 41, 49 |  | yes | yes |
| F1160 | *BRCA1* | c.5256_5278-2757del | p.Arg1753fs | 33 |  |  | yes | yes |
| F1270 | *BRCA1* | c.5256_5278-2757del | p.Arg1753fs | 48 |  | OvCa 43 | yes | yes |
| F1486 | *BRCA1* | c.5256_5278-2757del | p.Arg1753fs | 44 | 59 |  | yes | yes |
| F2057 | *BRCA1* | c.5256_5278-2757del | p.Arg1753fs | 40 |  | OvCa 59 | yes | no |
| F2091 | *BRCA1* | c.5256_5278-2757del | p.Arg1753fs | 47 |  | OvCa 62 | yes | yes |
| F2798 | *BRCA1* | c.5256_5278-2757del | p.Arg1753fs | 43 |  |  | yes | yes |
| F428 | *BRCA1* | c.5256_5278-2757del | p.Arg1753fs | 57 |  | OvCa 55 | yes | Ν/Α |
| F582 | *BRCA1* | c.5256_5278-2757del | p.Arg1753fs | 29 |  |  | yes | no |
| F698 | *BRCA1* | c.5256_5278-2757del | p.Arg1753fs | 38 | 42 | OvCa 48 | yes | N/A |
| F725 | *BRCA1* | c.5256_5278-2757del | p.Arg1753fs | 40 |  | OvCa 52 | yes | yes |
| F817 | *BRCA1* | c.5256_5278-2757del | p.Arg1753fs | 34 |  |  | yes | no |
| F937 | *BRCA1* | c.5256_5278-2757del | p.Arg1753fs | 38 |  |  | yes | yes |
| F113 | *BRCA1* | c.5266dupC | p.Gln1756fs | 39 |  |  | yes | yes |
| F1147 | *BRCA1* | c.5266dupC | p.Gln1756fs | 59 |  | OvCa 61 | yes | yes |
| F1159 | *BRCA1* | c.5266dupC | p.Gln1756fs | 35 |  |  | yes | no |
| F1228 | *BRCA1* | c.5266dupC | p.Gln1756fs | 34 |  |  | yes | N/A |
| F1236 | *BRCA1* | c.5266dupC | p.Gln1756fs | 36 | 46 |  | yes | yes |
| F125 | *BRCA1* | c.5266dupC | p.Gln1756fs | 42 | 49 |  | yes | yes |
| F1466 | *BRCA1* | c.5266dupC | p.Gln1756fs | 44 |  |  | yes | no |
| F1480 | *BRCA1* | c.5266dupC | p.Gln1756fs | 39 |  |  | yes | yes |
| F1581 | *BRCA1* | c.5266dupC | p.Gln1756fs | 59 | 68 |  | yes | yes |
| F1627 | *BRCA1* | c.5266dupC | p.Gln1756fs | 35 | 56 |  | yes | yes |
| F1648 | *BRCA1* | c.5266dupC | p.Gln1756fs | 32 |  |  | yes | yes |
| F172 | *BRCA1* | c.5266dupC | p.Gln1756fs | 59 |  |  | yes | no |
| F177 | *BRCA1* | c.5266dupC | p.Gln1756fs | 41 |  |  | yes | yes |
| F1776 | *BRCA1* | c.5266dupC | p.Gln1756fs | 42 |  | OvCa 49 | yes | yes |
| F1792 | *BRCA1* | c.5266dupC | p.Gln1756fs | 30 |  |  | N/A | yes |
| F180 | *BRCA1* | c.5266dupC | p.Gln1756fs | 47 |  |  | yes | yes |
| F1848 | *BRCA1* | c.5266dupC | p.Gln1756fs | 40 |  |  | yes | yes |
| F1862 | *BRCA1* | c.5266dupC | p.Gln1756fs | 28 |  |  | yes | no |
| F1883 | *BRCA1* | c.5266dupC | p.Gln1756fs | 31 |  |  | yes | no |
| F1947 | *BRCA1* | c.5266dupC | p.Gln1756fs | 43 |  |  | yes | yes |
| F198 | *BRCA1* | c.5266dupC | p.Gln1756fs | 35 |  |  | yes | no |
| F2024 | *BRCA1* | c.5266dupC | p.Gln1756fs | 62 |  | OvCa 50 | yes | N/A |
| F2082 | *BRCA1* | c.5266dupC | p.Gln1756fs | 34 |  |  | yes | yes |
| F2292 | *BRCA1* | c.5266dupC | p.Gln1756fs | 48 |  |  | yes | yes |
| F2323 | *BRCA1* | c.5266dupC | p.Gln1756fs | 35 |  |  | yes | no |
| F2415 | *BRCA1* | c.5266dupC | p.Gln1756fs | 42 | 61 |  | yes | yes |
| F2590 | *BRCA1* | c.5266dupC | p.Gln1756fs | 30 |  |  | N/A | yes |
| F2714 | *BRCA1* | c.5266dupC | p.Gln1756fs | 30 |  |  | yes | yes |
| F2765 | *BRCA1* | c.5266dupC | p.Gln1756fs | 49 |  |  | yes | yes |
| F2960 | *BRCA1* | c.5266dupC | p.Gln1756fs | 31 | 34 |  | yes | yes |
| F363 | *BRCA1* | c.5266dupC | p.Gln1756fs | 34 |  |  | yes | no |
| F364 | *BRCA1* | c.5266dupC | p.Gln1756fs | 33 |  |  | yes | no |
| F365 | *BRCA1* | c.5266dupC | p.Gln1756fs | 33 |  |  | yes | yes |
| F366 | *BRCA1* | c.5266dupC | p.Gln1756fs | 35 |  |  | yes | yes |
| F369 | *BRCA1* | c.5266dupC | p.Gln1756fs | 36 | 36 |  | yes | yes |
| F370 | *BRCA1* | c.5266dupC | p.Gln1756fs | 58 |  |  | yes | yes |
| F371 | *BRCA1* | c.5266dupC | p.Gln1756fs | 31 |  |  | yes | no |
| F387 | *BRCA1* | c.5266dupC | p.Gln1756fs | 37 |  |  | yes | no |
| F454 | *BRCA1* | c.5266dupC | p.Gln1756fs | 40 |  |  | yes | no |
| F572 | *BRCA1* | c.5266dupC | p.Gln1756fs | 33 |  |  | yes | no |
| F578 | *BRCA1* | c.5266dupC | p.Gln1756fs | 35 |  |  | yes | yes |
| F579 | *BRCA1* | c.5266dupC | p.Gln1756fs | 31 | 45 |  | yes | yes |
| F655 | *BRCA1* | c.5266dupC | p.Gln1756fs | 30 |  |  | yes | yes |
| F777 | *BRCA1* | c.5266dupC | p.Gln1756fs | 28 |  |  | no | no |
| F847 | *BRCA1* | c.5266dupC | p.Gln1756fs | 41 | 46 | OvCa 44 | yes | no |
| F887 | *BRCA1* | c.5266dupC | p.Gln1756fs | 33 |  |  | yes | no |
| F890 | *BRCA1* | c.5266dupC | p.Gln1756fs | 45 |  |  | yes | no |
| F933 | *BRCA1* | c.5266dupC | p.Gln1756fs | 29 |  |  | yes | yes |
| F963 | *BRCA1* | c.5266dupC | p.Gln1756fs | 40 |  |  | yes | no |
| F97 | *BRCA1* | c.5266dupC | p.Gln1756fs | 35 |  |  | yes | no |
| F1343 | *BRCA1* | c.5278-1G>T | p.Phe1761fs | 30 |  |  | yes | no |
| F553 | *BRCA1* | c.5328delC | p.Thr1777fs | 32 |  |  | yes | yes |
| F968 | *BRCA1* | c.5406+5G>T | p.Asp1778fs | 31 |  |  | N/A | yes |
| F1036 | *BRCA1* | c.5406+664_*8273del | p.Gly1803_Tyr1863del | 51 | 56 | OvCa 51 | yes | yes |
| F1073 | *BRCA1* | c.5406+664_*8273del | p.Gly1803_Tyr1863del | 45 | 48 |  | yes | yes |
| F1103 | *BRCA1* | c.5406+664_*8273del | p.Gly1803_Tyr1863del | 36 |  |  | yes | yes |
| F1514 | *BRCA1* | c.5406+664_*8273del | p.Gly1803_Tyr1863del | 33 | 40 |  | yes | yes |
| F1576 | *BRCA1* | c.5406+664_*8273del | p.Gly1803_Tyr1863del | 43 | 43 | OvCa 49 & PhaCa 57 | yes | no |
| F1713 | *BRCA1* | c.5406+664_*8273del | p.Gly1803_Tyr1863del | 48 |  |  | yes | N/A |
| F1796 | *BRCA1* | c.5406+664_*8273del | p.Gly1803_Tyr1863del | 37 |  |  | yes | yes |
| F1890 | *BRCA1* | c.5406+664_*8273del | p.Gly1803_Tyr1863del | 56 | 60 | OvCa 46 | yes | no |
| F1991 | *BRCA1* | c.5406+664_*8273del | p.Gly1803_Tyr1863del | 44 | 50 | OvCa 54 | yes | yes |
| F2000 | *BRCA1* | c.5406+664_*8273del | p.Gly1803_Tyr1863del | 47 |  | OvCa 67 | yes | no |
| F2432 | *BRCA1* | c.5406+664_*8273del | p.Gly1803_Tyr1863del | 31 |  |  | yes | no |
| F2639 | *BRCA1* | c.5406+664_*8273del | p.Gly1803_Tyr1863del | 33 |  |  | yes | yes |
| F2722 | *BRCA1* | c.5406+664_*8273del | p.Gly1803_Tyr1863del | 34 |  |  | yes | yes |
| F2740 | *BRCA1* | c.5406+664_*8273del | p.Gly1803_Tyr1863del | 26 |  |  | no | no |
| F2773 | *BRCA1* | c.5406+664_*8273del | p.Gly1803_Tyr1863del | 35 |  | OvCa 45 | yes | yes |
| F2789 | *BRCA1* | c.5406+664_*8273del | p.Gly1803_Tyr1863del | 48 |  |  | yes | yes |
| F2887 | *BRCA1* | c.5406+664_*8273del | p.Gly1803_Tyr1863del | 30 | 34 |  | yes | yes |
| F2911 | *BRCA1* | c.5406+664_*8273del | p.Gly1803_Tyr1863del | 30 | 31 |  | no | yes |
| F2945 | *BRCA1* | c.5406+664_*8273del | p.Gly1803_Tyr1863del | 36 |  |  | yes | yes |
| F400 | *BRCA1* | c.5406+664_*8273del | p.Gly1803_Tyr1863del | 37 |  |  | yes | yes |
| F416 | *BRCA1* | c.5406+664_*8273del | p.Gly1803_Tyr1863del | 27 | 37 | OvCa 39 | yes | yes |
| F422 | *BRCA1* | c.5406+664_*8273del | p.Gly1803_Tyr1863del | 33 |  |  | yes | N/A |
| F607 | *BRCA1* | c.5406+664_*8273del | p.Gly1803_Tyr1863del | 35 |  |  | no | N/A |
| F62 | *BRCA1* | c.5406+664_*8273del | p.Gly1803_Tyr1863del | 29 | 40,45 |  | yes | no |
| F661 | *BRCA1* | c.5406+664_*8273del | p.Gly1803_Tyr1863del | 47 | 60 | OvCa 67 | yes | N/A |
| F686 | *BRCA1* | c.5406+664_*8273del | p.Gly1803_Tyr1863del | 28 |  |  | yes | yes |
| F795 | *BRCA1* | c.5406+664_*8273del | p.Gly1803_Tyr1863del | 33 |  |  | yes | yes |
| F851 | *BRCA1* | c.5406+664_*8273del | p.Gly1803_Tyr1863del | 26 |  |  | yes | no |
| F891 | *BRCA1* | c.5406+664_*8273del | p.Gly1803_Tyr1863del | 46 |  |  | yes | no |
| F902 | *BRCA1* | c.5406+664_*8273del | p.Gly1803_Tyr1863del | 33 |  |  | yes | no |
| F930 | *BRCA1* | c.5406+664_*8273del | p.Gly1803_Tyr1863del | 56 |  |  | yes | yes |
| F942 | *BRCA1* | c.5406+664_*8273del | p.Gly1803_Tyr1863del | 50 | 50 |  | yes | yes |
| F976 | *BRCA1* | c.5406+664_*8273del | p.Gly1803_Tyr1863del | 29 |  |  | yes | yes |
| F1413 | *BRCA1* | c.5425G>T | p.Val1809Phe | 65 |  | EndCa 70 | yes | yes |
| F500 | *BRCA1* | c.5431C>T | p.Gln1811Ter | 29 |  |  | yes | yes |
| F757 | *BRCA1* | c.5431C>T | p.Gln1811Ter | 30 | 30 |  | yes | yes |
| F2751 | *BRCA1* | c.5431C>T | p.Gln1811Ter | 32 | 40 |  | yes | yes |
| F2002 | *BRCA1* | c.5434C>G | p.Gly1803_Ala1813del | 38 |  | OvCa 42 | yes | no |
| F155 | *BRCA1* | c.5467G>A | p.Gly1803_Ala1813del | 40 |  | OvCa 53 | yes | no |
| F178 | *BRCA1* | c.5467G>A | p.Gly1803_Ala1813del | 27 | 43 |  | yes | yes |
| F1829 | *BRCA1* | c.5467G>A | p.Gly1803_Ala1813del | 36 |  |  | yes | N/A |
| F2060 | *BRCA1* | c.5467G>A | p.Gly1803_Ala1813del | 46 |  | OvCa 46 | yes | no |
| F2422 | *BRCA1* | c.5467G>A | p.Gly1803_Ala1813del | 33 |  |  | yes | yes |
| F2497 | *BRCA1* | c.5467G>A | p.Gly1803_Ala1813del | 39 | 52 |  | yes | yes |
| F388 | *BRCA1* | c.5467G>A | p.Gly1803_Ala1813del | 34 |  |  | yes | yes |
| F576 | *BRCA1* | c.5467G>A | p.Gly1803_Ala1813del | 43 | 45,51 |  | yes | yes |
| F628 | *BRCA1* | c.5467G>A | p.Gly1803_Ala1813del | 55 |  | CRC 55 | yes | yes |
| F1059 | *BRCA1* | c.5468-285_*4019delinsCACAG | p.0 | 29 | 35 |  | yes | yes |
| F1131 | *BRCA1* | c.5468-285_*4019delinsCACAG | p.0 | 37 | 40 |  | yes | yes |
| F1174 | *BRCA1* | c.5468-285_*4019delinsCACAG | p.0 | 61 |  | OvCa 53 | yes | N/A |
| F1278 | *BRCA1* | c.5468-285_*4019delinsCACAG | p.0 | 50 |  | OvCa 50 | yes | yes |
| F1293 | *BRCA1* | c.5468-285_*4019delinsCACAG | p.0 | 33 |  |  | yes | yes |
| F1523 | *BRCA1* | c.5468-285_*4019delinsCACAG | p.0 | 37 |  |  | yes | yes |
| F1563 | *BRCA1* | c.5468-285_*4019delinsCACAG | p.0 | 43 |  |  | yes | no |
| F1889 | *BRCA1* | c.5468-285_*4019delinsCACAG | p.0 | 38 | 40 | OvCa 44 | yes | yes |
| F196 | *BRCA1* | c.5468-285_*4019delinsCACAG | p.0 | 37 |  |  | yes | yes |
| F2068 | *BRCA1* | c.5468-285_*4019delinsCACAG | p.0 | 34 |  |  | yes | yes |
| F2125 | *BRCA1* | c.5468-285_*4019delinsCACAG | p.0 | 49 |  |  | yes | yes |
| F2405 | *BRCA1* | c.5468-285_*4019delinsCACAG | p.0 | 33 |  |  | yes | yes |
| F2587 | *BRCA1* | c.5468-285_*4019delinsCACAG | p.0 | 39 |  |  | yes | yes |
| F284 | *BRCA1* | c.5468-285_*4019delinsCACAG | p.0 | 53 |  | OvCa 52 | yes | N/A |
| F332 | *BRCA1* | c.5468-285_*4019delinsCACAG | p.0 | 28 | 43 | OvCa 33 & EndCa 38 | yes | yes |
| F382 | *BRCA1* | c.5468-285_*4019delinsCACAG | p.0 | 29 |  |  | yes | yes |
| F442 | *BRCA1* | c.5468-285_*4019delinsCACAG | p.0 | 38 |  |  | yes | yes |
| F514 | *BRCA1* | c.5468-285_*4019delinsCACAG | p.0 | 33 |  |  | yes | yes |
| F567 | *BRCA1* | c.5468-285_*4019delinsCACAG | p.0 | 29 | 29 |  | yes | yes |
| F736 | *BRCA1* | c.5468-285_*4019delinsCACAG | p.0 | 28 |  |  | yes | yes |
| F764 | *BRCA1* | c.5468-285_*4019delinsCACAG | p.0 | 33 | 44 |  | yes | yes |
| F2054 | *BRCA1* | c.5492delC | p.Pro1831fs | 41 |  |  | yes | no |
| F2430 | *BRCA1* | c.5492delC | p.Pro1831fs | 52 |  | VaCa 76 | yes | no |
| F2803 | *BRCA1* | c.5492delC | p.Pro1831fs | 50 | 62 |  | yes | no |
| F2825 | *BRCA1* | c.5492delC | p.Pro1831fs | 42 |  |  | yes | no |
| F782 | *BRCA1* | c.5492delC | p.Pro1831fs | 29 |  |  | yes | no |
| F1294 | *BRCA1* | c.5497G>A | p.Val1833Met | 33 |  |  | yes | yes |
| F1434 | *BRCA1* | c.5497G>A | p.Val1833Met | 45 |  | OvCa 74 | yes | no |
| F1439 | *BRCA1* | c.5497G>A | p.Val1833Met | 43 |  |  | yes | no |
| F1460 | *BRCA1* | c.5497G>A | p.Val1833Met | 27 |  |  | yes | yes |
| F1967 | *BRCA1* | c.5497G>A | p.Val1833Met | 49 |  |  | yes | yes |
| F2107 | *BRCA1* | c.5497G>A | p.Val1833Met | 52 |  | OvCa 59 | yes | yes |
| F2164 | *BRCA1* | c.5497G>A | p.Val1833Met | 38 |  |  | yes | yes |
| F2233 | *BRCA1* | c.5497G>A | p.Val1833Met | 33 |  |  | yes | no |
| F2596 | *BRCA1* | c.5497G>A | p.Val1833Met | 38 |  |  | yes | yes |
| F636 | *BRCA1* | c.5497G>A | p.Val1833Met | 66 |  |  | yes | yes |
| F649 | *BRCA1* | c.5497G>A | p.Val1833Met | 51 |  |  | yes | no |
| F1761 | *BRCA1* | c.5503C>T | p.Arg1835Ter | 39 | 54 |  | yes | yes |
| F2566 | *BRCA1* | c.5533dupT | p.Tyr1845fs | 33 |  |  | no | yes |
| F681 | *BRCA1* | c.5556_5560delCTACC | p.Tyr1853fs | 37 |  |  | yes | no |
| F897 | *BRCA2* | c.-806G>A | p.? | 41 |  |  | yes | no |
| F335 | *BRCA2* | c.10G>T | p.Gly4Ter | 56 |  |  | yes | N/A |
| F1516 | *BRCA2* | c.537dupT | p.Ile180fs | 41 |  |  | yes | no |
| F1596 | *BRCA2* | c.537dupT | p.Ile180fs | 42 |  |  | yes | no |
| F1111 | *BRCA2* | c.658_659delGT | p.Val220fs | 38 |  |  | yes | no |
| F549 | *BRCA2* | c.658_659delGT | p.Val220fs | 48 |  | CRC 48, OvCa 50 | yes | N/A |
| F2669 | *BRCA2* | c.682-1G>T | p.? | 44 | 82 |  | yes | no |
| F1481 | *BRCA2* | c.1405_1406delGA | p.Asp469Terfs | 40 |  |  | yes | no |
| F2215 | *BRCA2* | c.1405_1406delGA | p.Asp469Terfs | 34 |  |  | no | yes |
| F753 | *BRCA2* | c.1405_1406delGA | p.Asp469Terfs | 43 |  |  | yes | no |
| F2799 | *BRCA2* | c.1117C>T | p.Gln373Ter | 71 |  | CRC 57 | yes | no |
| F2809 | *BRCA2* | c.1532C>A | p.Ser511Ter | 45 | 47 |  | yes | no |
| F1292 | *BRCA2* | c.1813dupA | p.Ile605fs | 33 |  |  | yes | no |
| F1597 | *BRCA2* | c.2339C>G | p.Ser780Ter | 31 | 36 |  | yes | no |
| F1817 | *BRCA2* | c.2339C>G | p.Ser780Ter | 52 |  |  | yes | no |
| F801 | *BRCA2* | c.2339C>G | p.Ser780Ter | 33 |  |  | yes | yes |
| F2117 | *BRCA2* | c.2490_2491insT | p.Val831fs | 45 |  |  | yes | yes |
| F1546 | *BRCA2* | c.2808_2811delACAA | p.Ala938fs | 34 | 55 |  | yes | no |
| F2477 | *BRCA2* | c.2808_2811delACAA | p.Ala938fs | 62 |  |  | yes | no |
| F2599 | *BRCA2* | c.2808_2811delACAA | p.Ala938fs | 37 |  |  | yes | yes |
| F2908 | *BRCA2* | c.2808_2811delACAA | p.Ala938fs | 40 |  |  | yes | no |
| F1688 | *BRCA2* | c.3554_3563delCAGTTGAAAT | p.Thr1185fs | 43 |  |  | yes | no |
| F349 | *BRCA2* | c.3554_3563delCAGTTGAAAT | p.Thr1185fs | 33 |  |  | N/A | no |
| F1743 | *BRCA2* | c.3865_3868delAAAT | p.Lys1289fs | 42 |  |  | yes | no |
| F135 | *BRCA2* | c.4409_4410delTA | p.Ile1470fs | 28 |  |  | no | no |
| F1850 | *BRCA2* | c.4415_4418delAGAA | p.Lys1472fs | 32 |  |  | yes | no |
| F1204 | *BRCA2* | c.4415_4418delAGAA | p.Lys1472fs | 42 |  |  | yes | no |
| F2582 | *BRCA2* | c.4415_4418delAGAA | p.Lys1472fs | 45 |  |  | yes | yes |
| F967 | *BRCA2* | c.4415_4418delAGAA | p.Lys1472fs | 30 | 42 |  | yes | yes |
| F934 | *BRCA2* | c.4515_4525delCTTCCAGGGAC | p.Phe1506fs | 54 |  | OvCa 53 | yes | no |
| F2458 | *BRCA2* | c.4530delC | p.Glu1511fs | 32 | 32 |  | yes | no |
| F591 | *BRCA2* | c.4530delC | p.Glu1511fs | 46 | 60 |  | yes | no |
| F2716 | *BRCA2* | c.4530delC | p.Glu1511fs | 39 |  |  | yes | no |
| F1802 | *BRCA2* | c.4654_4657delGGTA | p.Glu1552fs | 38 |  |  | yes | yes |
| F427 | *BRCA2* | c.4769delA | p.Lys1590fs | 38 | 42 |  | yes | no |
| F435 | *BRCA2* | c.4769delA | p.Lys1590fs | 43 |  |  | yes | no |
| F478 | *BRCA2* | c.4769delA | p.Lys1590fs | 32 |  |  | N/A | no |
| F2548 | *BRCA2* | c.5110_5113delAGAA | p.Arg1704Terfs | 35 |  |  | yes | no |
| F642 | *BRCA2* | c.5349_5351delAAA | p.Lys1783del | 25 | 48 |  | yes | no |
| F2046 | *BRCA2* | c.5645C>A | p.Ser1882Ter | 53 |  | OvCa 63 | yes | yes |
| F2264 | *BRCA2* | c.5645C>A | p.Ser1882Ter | 28 |  |  | yes | no |
| F653 | *BRCA2* | c.5722_5723delCT | p.Leu1908fs | 49 |  |  | yes | no |
| F1525 | *BRCA2* | c.5791C>T | p.Gln1931Ter | 49 |  |  | yes | no |
| F2535 | *BRCA2* | c.6037A>T | p.Lys2013Ter | 58 | 63 |  | yes | no |
| F969 | *BRCA2* | c.6490C>T | p.Gln2164Ter | 42 |  |  | yes | no |
| F1002 | *BRCA2* | c.6600_6601delTT | p.Ser2201Terfs | 41 |  |  | yes | no |
| F2890 | *BRCA2* | c.6771delC | p.Glu2258fs | 37 | 45 |  | yes | no |
| F1572 | *BRCA2* | c.6842_7007del6421 | p.Gly2281fs | 49 | 57 |  | yes | no |
| F903 | *BRCA2* | c.6842_7007del6421 | p.Gly2281fs | 25 |  |  | yes | no |
| F943 | *BRCA2* | c.6842_7007del6421 | p.Gly2281fs | 47 |  | OvCa 56 | yes | no |
| F980 | *BRCA2* | c.6842_7007del6421 | p.Gly2281fs | 36 | 36 |  | yes | no |
| F1972 | *BRCA2* | c.6941delC | p.Thr2314fs | 62 |  | OvCa 54 | yes | no |
| F2199 | *BRCA2* | c.6941delC | p.Thr2314fs | 38 |  | OvCa 37 | yes | no |
| F852 | *BRCA2* | c.6941delC | p.Thr2314fs | 27 |  |  | yes | no |
| F2763 | *BRCA2* | c.7007G>A | p.Gly2313fs | 44 | 44 |  | yes | no |
| F1251 | *BRCA2* | c.7363delC | p.His2455fs | 35 |  |  | yes | no |
| F1284 | *BRCA2* | c.7806-2A>T | p.Ala2603_Arg2659del | 38 | 41 |  | yes | no |
| F2483 | *BRCA2* | c.7806-2A>T | p.Ala2603_Arg2659del | 37 |  |  | yes | no |
| F2558 | *BRCA2* | c.7806-2A>T | p.Ala2603_Arg2659del | 58 |  |  | yes | no |
| F560 | *BRCA2* | c.7806-2A>T | p.Ala2603_Arg2659del | 31 |  |  | yes | no |
| F1098 | *BRCA2* | c.7879A>T | p.Ile2627Phe | 41 |  |  | yes | no |
| F720 | *BRCA2* | c.7879A>T | p.Ile2627Phe | 45 |  |  | yes | no |
| F1217 | *BRCA2* | c.7913_7917delTTCCT | p.Phe2638Terfs | 38 |  |  | yes | yes |
| F1210 | *BRCA2* | c.7976G>A | p.Ala2603_Arg2659del | 45 |  |  | yes | no |
| F1301 | *BRCA2* | c.7976G>A | p.Ala2603_Arg2659del | 35 | 35 |  | yes | no |
| F1316 | *BRCA2* | c.7976G>A | p.Ala2603_Arg2659del | 56 |  |  | yes | no |
| F1124 | *BRCA2* | c.8364G>A | p.Trp2788Ter | 43 |  |  | yes | no |
| F2468 | *BRCA2* | c.8364G>A | p.Trp2788Ter | 53 |  | OvCa 56 | yes | no |
| F1763 | *BRCA2* | c.8546delA | p.Lys2849fs | 37 |  |  | yes | no |
| F1698 | *BRCA2* | c.8592delC | p.Leu2865fs | 47 |  |  | yes | no |
| F2715 | *BRCA2* | c.8754+1G>A | p.Glu2918fs | 44 |  |  | yes | no |
| F537 | *BRCA2* | c.8800delC | p.Gln2934fs | 39 | 55 |  | yes | no |
| F1069 | *BRCA2* | c.8930delA | p.Tyr2977fs | 41 | 41 |  | yes | no |
| F465 | *BRCA2* | c.8993_9024del32 | p.Ser2998fs | 28 |  |  | N/A | N/A |
| F2354 | *BRCA2* | c.9016_9017delTA | p.Tyr3006fs | 41 |  |  | yes | no |
| F989 | *BRCA2* | c.9097dupA | p.Thr3033fs | 33 |  |  | yes | no |
| F2420 | *BRCA2* | c.9246_9247insA | p.Thr3085fs | 29 | 44 |  | yes | no |
| F666 | *BRCA2* | c.9376C>T | p.Gln3126Ter | 47 |  |  | yes | no |
| F160 | *BRCA2* | c.9382C>T | p.Arg3128Ter | 29 |  |  | yes | N/A |
| F1433 | *BRCA2* | c.9501+1 G>A | p.Gly3086_Gly3167del | 36 |  |  | yes | no |
| F1981 | *BRCA2* | c.9501+1 G>A | p.Gly3086_Gly3167del | 39 |  |  | yes | no |
| F2028 | *BRCA2* | c.9501+1 G>A | p.Gly3086_Gly3167del | 32 |  |  | yes | no |
| F1741 | *BRIP1* | c.2786_2789delTATC | p.Leu929fs | 40 |  |  | yes | no |
| F1473 | *BRIP1* | c.2947delA | p.Ile983fs | 29 |  |  | yes | no |
| F2189 | *CDKN2A* | c.71G>C | p.Arg24Pro | 36 |  |  | yes | yes |
| F876 | *CHEK2* | c.(?_-1900)_(?_1-1)del | p.? | 47 | 56 |  | yes | N/A |
| F993 | *CHEK2* | c.100C>T | p.Glu34Ter | 47 |  |  | yes | no |
| F1081 | *CHEK2* | c.320_592del6160 | p.Glu107_Lys197del | 36 |  |  | no | no |
| F124 | *CHEK2* | c.475T>C | p.Tyr159His | 30 |  |  | no | no |
| F259 | *CHEK2* | c.475T>C | p.Tyr159His | 57 |  |  | yes | N/A |
| F508 | *CHEK2* | c.480_481insAAA | p.Glu161fs | 39 | 58 |  | yes | yes |
| F2050 | *CHEK2* | c.499G>A | p.Gly167Arg | 46 |  |  | yes | no |
| F2469 | *CHEK2* | c.499G>A | p.Gly167Arg | 35 |  |  | yes | no |
| F667 | *CHEK2* | c.499G>A | p.Gly167Arg | 34 |  |  | yes | no |
| F2305 | *CHEK2* | c.507delT | p.Phe169fs | 41 |  |  | yes | no |
| F322 | *CHEK2* | c.507delT | p.Phe169fs | 51 | 67 |  | yes | N/A |
| F509 | *CHEK2* | c.548T>C | p.Leu183Ser | 48 |  |  | yes | N/A |
| F1018 | *CHEK2* | c.549G>C | p.Leu183Phe | 36 |  |  | yes | no |
| F1327 | *CHEK2* | c.549G>C | p.Leu183Phe | 31 |  |  | yes | no |
| F1484 | *CHEK2* | c.549G>C | p.Leu183Phe | 29 |  |  | yes | no |
| F459 | *CHEK2* | c.549G>C | p.Leu183Phe | 46 |  |  | yes | N/A |
| F1313 | *CHEK2* | c.592+3A>T | p.Glu149fs | 50 | 52 | CRC 53 | yes | no |
| F2482 | *CHEK2* | c.592+3A>T | p.Glu149fs | 33 |  |  | yes | no |
| F1136 | *CHEK2* | c.793_846del7566 | p.Asp265_His282del | 50 |  |  | yes | N/A |
| F1556 | *CHEK2* | c.1100delC | p.Thr367fs | 41 | 42 |  | yes | no |
| F2839 | *CHEK2* | c.1188delT | p.Val397fs | 30 |  |  | N/A | no |
| F802 | *CHEK2* | c.1368dupA | p.Glu457fs | 48 |  |  | yes | no |
| F2464 | *DICER1* | c.5563C>T | p.Arg1855Ter | 66 |  |  | yes | no |
| F1922 | *ERCC3* | c.325C>T | p.Arg109Ter | 32 |  |  | no | yes |
| F2734 | *FANCD2* | c.2917_2918delTC | p.Ser973fs | 53 |  | OvCa 56 | yes | no |
| F2495 | *FANCI* | c.1597C>T | p.Arg533Ter | 36 |  |  | yes | yes |
| F2484 | *FANCL* | c.2T>C | p.Met1? | 30 |  |  | no | no |
| F2795 | *FANCL* | c.2T>C | p.Met1? | 40 |  |  | yes | yes |
| F2717 | *FANCM* | c.4843A>T | p.Lys1615Ter | 29 |  |  | yes | no |
| F2529 | *FANCM* | c.5314_5315delTG | p.Cys1772Ter | 47 |  |  | yes | no |
| F1178 | *MLH1* | c.1036C>T | p.Gln346Ter | 32 | 34 | CRC 50 | yes | no |
| F1272 | *MSH6* | c.3169_3170delTT | p.Leu1057fs | 50 | 50 |  | yes | no |
| F643 | *MSH6* | c.3953_3956delGAAA | p.Arg1318fs | 31 |  |  | no | no |
| F714 | *MSH6* | c.4005_4008delAGTT | p.Glu1335fs | 31 |  |  | N/A | N/A |
| F258 | *NBN* | c.657_661delACAAA | p.Lys219fs | 37 |  |  | yes | N/A |
| F1673 | *NBN* | c.896+2C>T | p.? | 33 |  |  | yes | no |
| F1487 | *NBN* | c.2140C>T | p.Arg714Ter | 30 |  |  | yes | no |
| F2560 | *NF1* | c.3525_3526delAA | p.Arg1176fs | 31 |  |  | yes | no |
| F1769 | *PALB2* | c.1140_1143delTCTT | p.Ser380fs | 34 | 41 |  | yes | no |
| F924 | *PALB2* | c.1591_1600delTTGCCAACTT | p.Leu531fs | 30 |  |  | yes | yes |
| F1309 | *PALB2* | c.2257C>T | p.Arg753Ter | 58 |  |  | yes | no |
| F1586 | *PALB2* | c.2257C>T | p.Arg753Ter | 34 |  |  | yes | no |
| F945 | *PALB2* | c.2257C>T | p.Arg753Ter | 34 |  |  | yes | no |
| F2736 | *PALB2* | c.2747_2748+4delAGGTAA | p.Glu916fs | 37 | 37 |  | yes | no |
| F2010 | *PALB2* | c.3255dupG | p.Arg1086fs | 38 |  |  | yes | yes |
| F2514 | *PMS2* | c.1261C>T | p.Arg421Ter | 59 |  |  | yes | no |
| F1511 | *PMS2* | c.1414A>T | p.Lys472Ter | 52 |  |  | yes | no |
| F975 | *PTEN* | c.424delC | p.Arg142fs | 30 |  |  | yes | no |
| F775 | *PTEN* | c.697C>T | p.Arg233Ter | 35 |  |  | N/A | no |
| F1173 | *RAD51C* | c.706-2A>C | p.Val236_Ala279del | 40 |  |  | yes | yes |
| F2216 | *RAD51C* | c.706-2A>C | p.Val236_Ala279del | 50 | 50 | OvCa 54 | yes | no |
| F2322 | *RAD51C* | c.706-2A>C | p.Val236_Ala279del | 56 |  |  | yes | no |
| F879 | *RAD51C* | c.706-2A>C | p.Val236_Ala279del | 37 |  |  | yes | yes |
| F2907 | *RAD51C* | c.709C>T | p.Arg237Ter | 33 |  |  | yes | no |
| F1394 | *RAD51C* | c.904+5G>T | p.Val280_Gly302del | 44 | 44 |  | yes | yes |
| F1758 | *RAD51C* | c.904+5G>T | p.Val280_Gly302del | 47 | 58 |  | yes | no |
| F752 | *RAD51D* | c.451C>T | p.Gln151Ter | 55 |  |  | yes | no |
| F2247 | *RAD51D* | c.556C>T | p.Arg186Ter | 43 |  |  | yes | yes |
| F1695 | *RAD51D* | c.709C>T | p.Arg237Ter | 39 |  |  | yes | no |
| F487 | *RAD51D* | c.898C>T | p.Arg300Ter | 33 |  |  | yes | no |
| F774 | *SDHB* | c.445C>T | p.Gln149Ter | 28 |  |  | no | no |
| F1746 | *SLX4* | c.4089_4090delAG | p.Asp1365fs | 45 |  |  | yes | no |
| F1686 | *TP53* | c.(?_-17900)_(?_1-1)del | p.? | 29 |  |  | no | no |
| F920 | *TP53* | c.324_327dupTTTC | p.Arg110fs | 20 |  |  | yes | yes |
| F329 | *TP53* | c.375G>A | p.Ser33_Thr125del | 24 | 36 | OvCa 33 | yes | no |
| F1995 | *TP53* | c.559+2T>C | p.? | 30 |  |  | yes | no |
| F1966 | *TP53* | c.578A>T | p.His193Leu | 24 | 30 |  | yes | yes |
| F1359 | *TP53* | c.847C>T | p.Arg283Cys | 31 |  |  | yes | no |
| F1963 | *TP53* | c.847C>T | p.Arg283Cys | 36 |  |  | yes | no |
| F812 | *TP53* | c.1021T>G | p.Phe341Val | 35 | 40 |  | yes | no |
| F543 | *BRCA1 & BRCA2* | c.5406+664_*8273del | p.Gly1803_Tyr1863del |  |  |  | yes | yes |
| c.9748dupT | p.Ser3250fs | 31 | 49 |  |
| F330 | *BRCA1 & PALB2* | c.5497G>A | p.Val1833Met |  |  |  | yes | N/A |
| c.2257C>T | p.Arg753Ter | 44 |  |  |
| F1281 | *BRCA2 & SDHC* | c.7879A>T | p.Ile2627Phe |  |  |  | no | no |
| c.397C>T | p.Arg133Ter | 31 | 31 |  |
| F2070 | *BRCA2 & RECQL4* | c.1813dupA | p.Ile605fs |  |  |  | yes | no |
| c.1879-1G>A | p.? | 46 |  | OvCa 63 |
| F2540 | *BRCA2 & RAD51C* | c.2490_2491insT | p.Val831fs |  |  |  | yes | no |
| c.904+5G>Τ | p.Val280_Gly302del | 46 | 56 |  |
| F882 | *BRCA2 & ATM* | c.(80+1_81-1)_(593+1_594-1)del | p.? |  |  |  | yes | no |
| c.3576G>A | p.Ser1135_Lys1192del | 40 |  |  |
| F2516 | *ERCC3 & FANCC* | c.576_583delCGTGATCC | p.Pro192fs |  |  |  | no | yes |
| c.346-1G>A | p.? | 34 |  |  |
| F2364 | *PALB2 & SLX4* | c.2747_2748+4delAGGTAA | p.Glu916fs |  |  |  | yes | no |
| c.4089_4090delAG | p.Asp1365fs | 44 |  | OvCa 48 |
| F776 | *PALB2 & ATM* | c.2257C>T | p.Arg753Ter |  |  |  | yes | no |
| c.1562_1563delAG | p.Glu522fs | 33 |  |  |
| F1097 | *PTEN & PALB2* | c.697C>T | p.Arg233Ter |  |  |  | yes | no |
| c.3426dupA | p.Leu1143fs | 36 |  |  |

Variant nomenclature was based on the following reference sequences: *ATM NM_000051.3; BLM NM_000057.3; BRCA1 NM_007294.3; BRCA2 NM_000059.3; BRIP1 NM_032043.2; CDKN2A NM_000077.4; CHEK2 NM_007194.3; DICER1 NM_030621.4; ERCC3 NM_000122.1; FANCC NM_000136.2; FANCD2 NM_001018115.1; FANCI NM_001113378.1; FANCL NM_018062.3; FANCM NM_020937.2; MLH1 NM_000249.3; MSH6 NM_000179.2; NBN NM_002485.4; NF1 NM_001042492.2; PALB2 NM_024675.3; PTEN NM_000314.6; PMS2 NM_000535.6; RAD51C NM_058216.2; RAD51D NM_002878.3; RECQL4 NM_004260.3; SDHB NM_003000.2; SDHC NM_003001.3; SLX4 NM_032444.2* and *TP53 NM_000546.5.*

*Abbreviations used: dx, diagnosis; TNBC, triple-negative breast cancer; FH, family history; Ca, cancer; Br, breast; Ov, ovarian; Pr, prostate; Pha, pharyngeal; End, endometrial; CRC, colorectal cancer; Pan, pancreatic; Va, ampulla of Vater; y, years and N/A, Not Available;*

*Blue color highlights individuals carrying two LoF alleles. Family history yes: at least two family relatives, irrespectively of degree and age at diagnosis, with BrCa and/or OvCa and/or PanCa.*
